# Supplementary material
Source: publisher figshare collection journal article supplement (https://tandf.figshare.com/ndownloader/files/33676044)
Supplement: Supplementary file 1 [file 33676044]

**Formation and Occurrence Characteristics of Methane Hydrate in the Complex System of Sodium Dodecyl Sulfate and Porous Media**

***Calculation formulas***

The gas consumption in the process of hydrate formation can be calculated by equation (1)[1]:

(1)

Where *P0* and *Pt*are the pressure in the reactor at the initial time and *t* time respectively; *V0* and *Vt* are the gas phase volume at the initial time and *t* time, respectively; *T0* and *Tt*are the temperatures at the initial time and t time, respectively; *R* is the gas constant; *m* is the hydration number, where 5.75 is taken; *ΔV* is the molar volume difference between hydrates and water, where 4.6 cm3 is taken; *z0* and *zt* are the gas compression factors at 0 time and *t* time, respectively. Where *zt* can be calculated by the following equation[2]:

(2)

For methane gas, *Tc* is 190.6 K, *Pc*is 4.599 MPa, *ω* is 0.012.

The gas storage capacity of solution *Sl* and hydrate formation rate *Rt* can be obtained from equations (3) and (4)[3]:

(3)

(4)

Where: *nw* is the number of moles of water filled in the bed.

(5)

Where: *Cs* is the gas storage density; *Vg* and *Vw* are the molar volumes of methane and water; *Vi* is the volume of the solution used, and *Vu* is the volume of the remaining solution.

Table S1 Properties of activated alumina and glass beads

| Activated alumina | | Glass beads | |
| --- | --- | --- | --- |
| Ingredients | % | Ingredients | % |
| Al2O3 | ≥95 | SiO2 | ≥67 |
| Fe2O3 | ≤0.04 | Na2O | ≤14 |
| SiO2 | ≤0.1 | CaO | ≥8 |
| Na2O | ≤0.3 | MgO | ≥2.5 |
| Particle size | 1, 3 and 5 mm | Particle size | 1, 3 and 5 mm |
| Stacking density | 0.70-0.75 g/cm3 | Stacking density | 1.50 g/cm3 |
| Specific surface area | ≥300 m2/g | Specific surface area | — |
| Hole volume | 0.38-0.40 cm3/g | Hole volume | — |


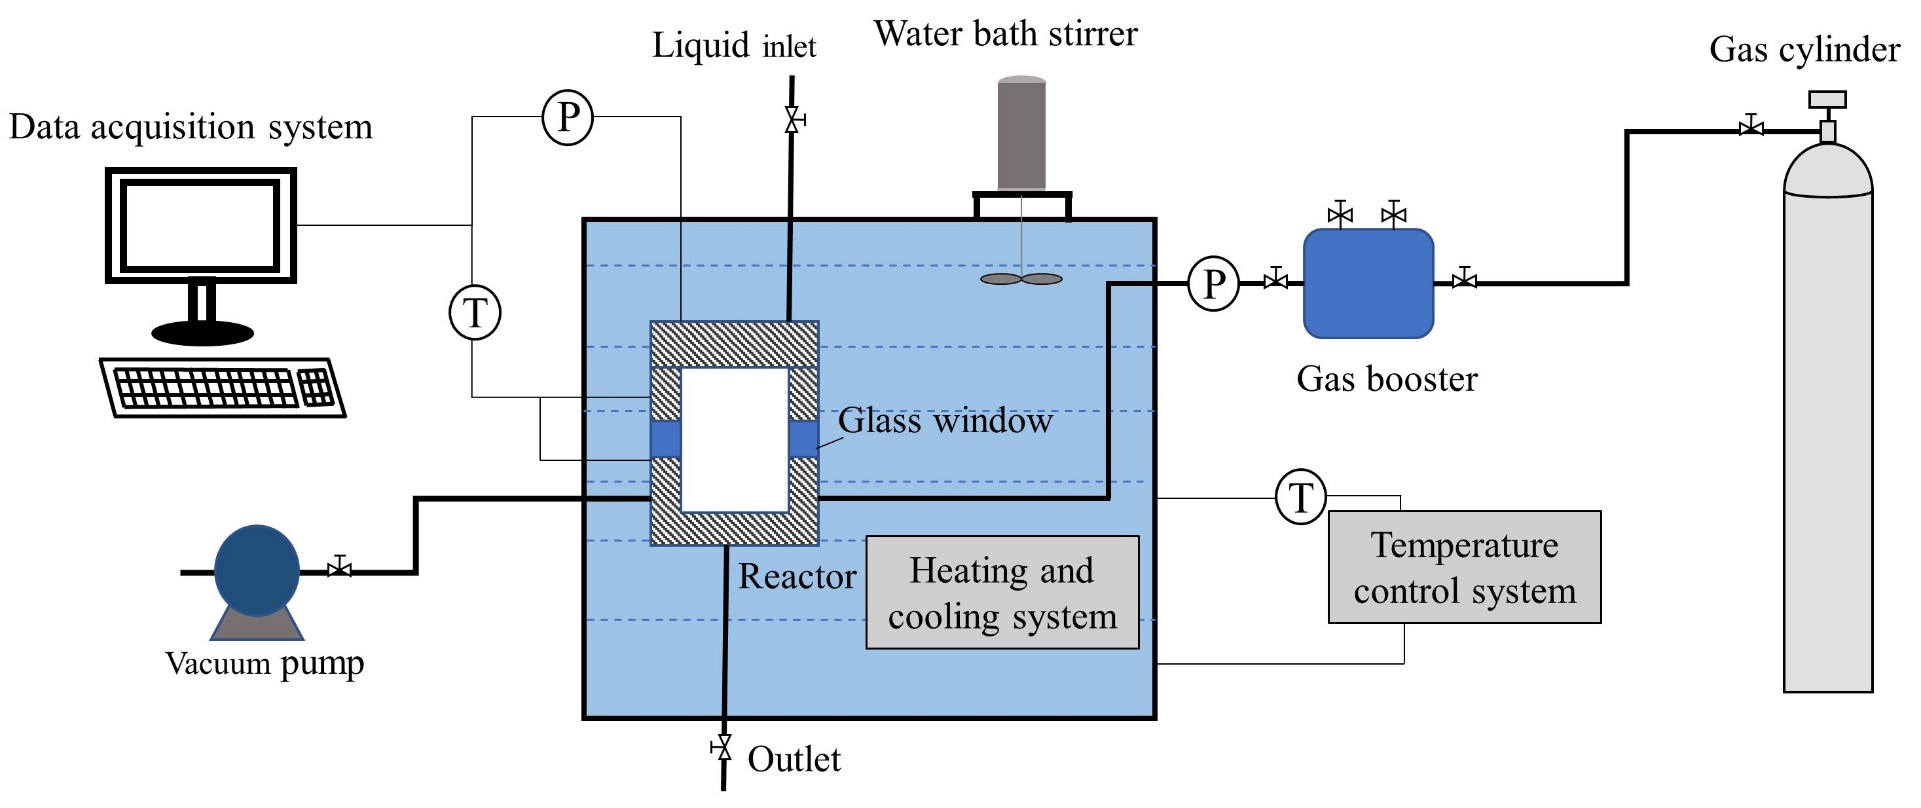


**Figure S1 Schematic diagram of experimental equipment**





**Figure S2 Hydrate growth rate in different complex systems at a temperature of 273.15 K and an initial pressure of 6 MPa**


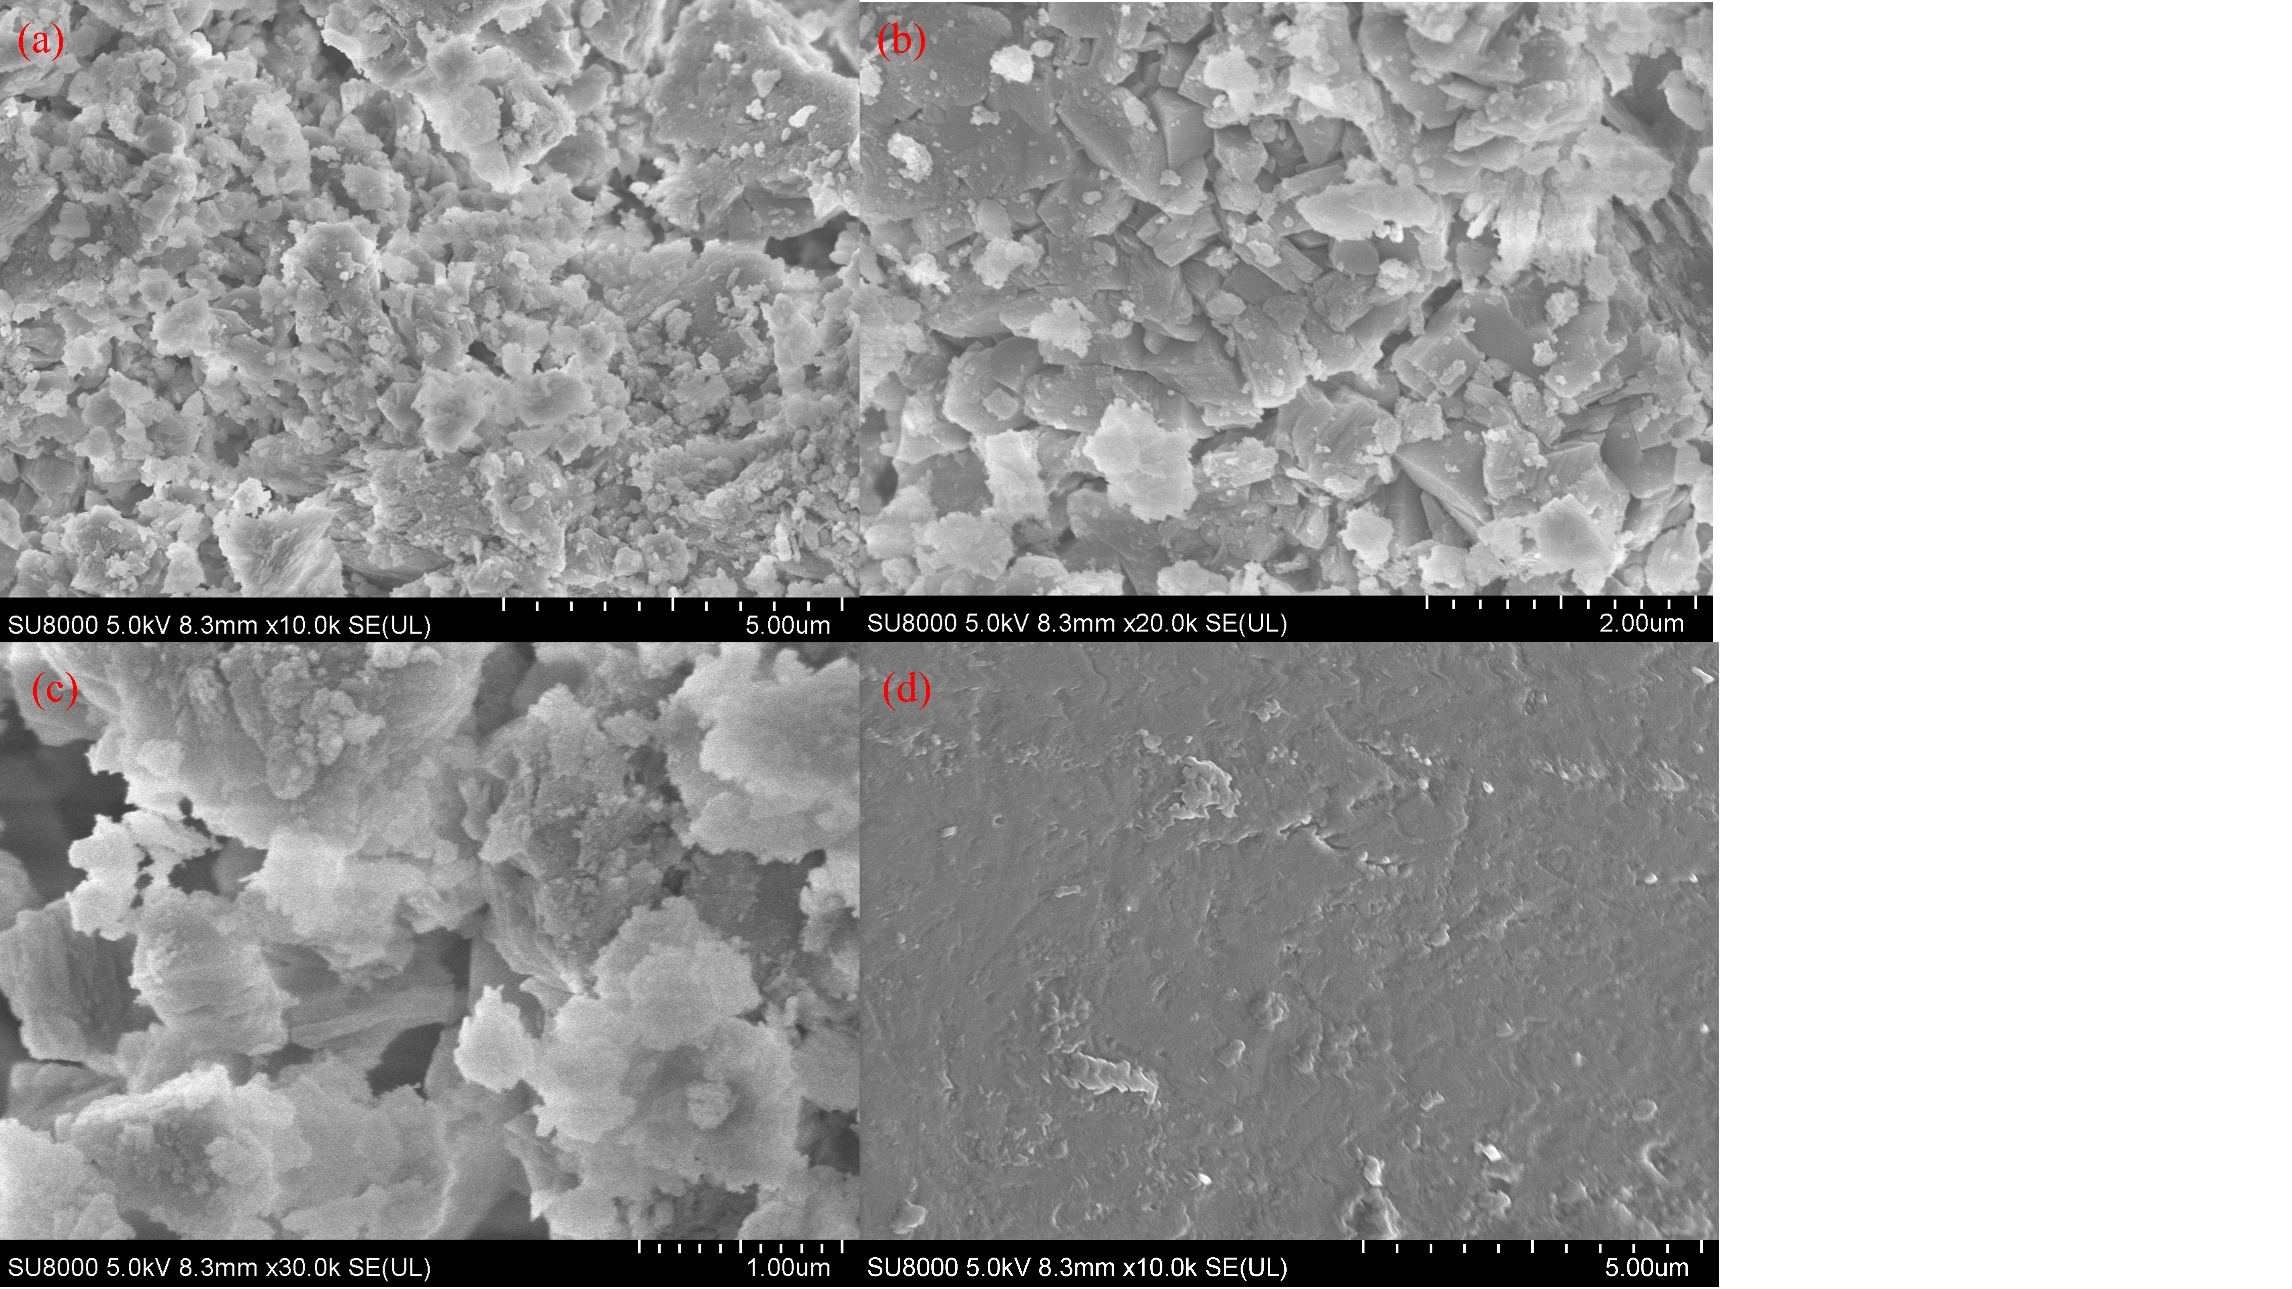


**Figure S3 (a) (b) (c): Surface morphology of activated alumina particle at magnifications of 10.0 k, 20.0 k, and 30.0 k (d) Surface morphology of glass bead particle at a magnification of 10.0 k**


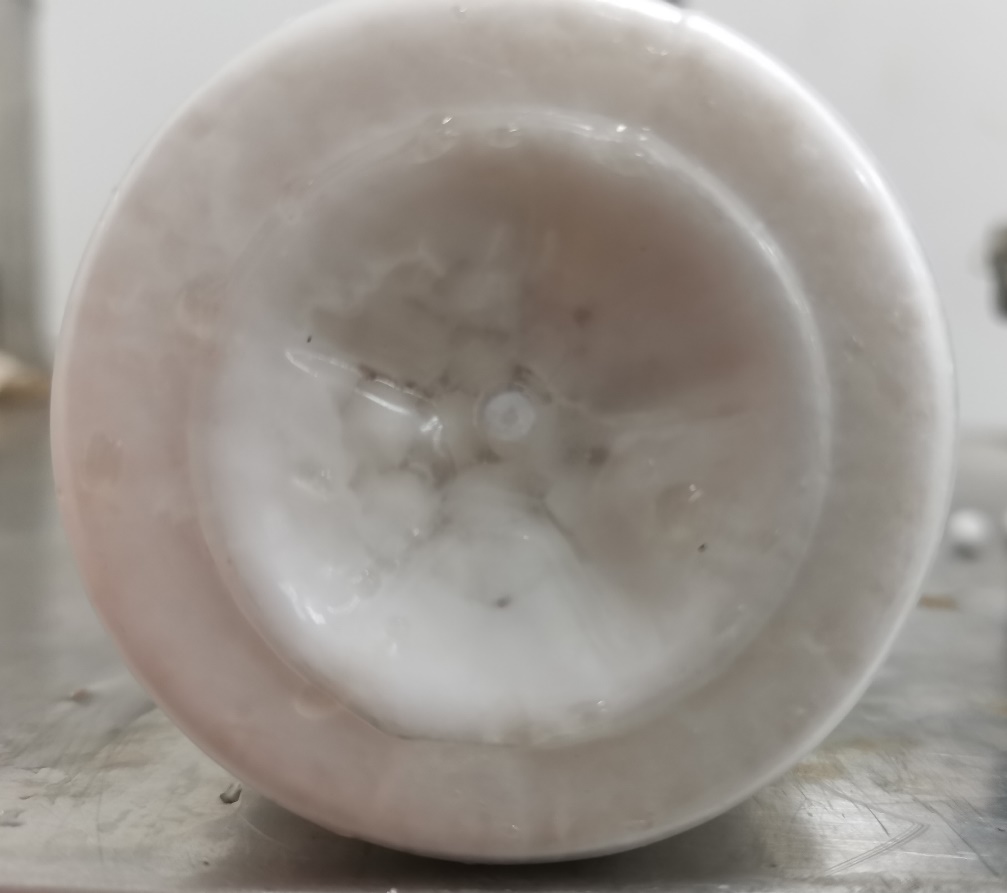


**Figure S4 There is no hydrate in the center of the unsaturated bed**

**Reference**

[1] Wang, F.; Luo, S.-J.; Fu, S.-F.; Jia, Z.-Z.; Dai, M.; Wang, C.-S.; Guo, R.-B. Methane hydrate formation with surfactants fixed on the surface of polystyrene nanospheres. *J. Mater. Chem.* **2015**, *3*, 8316-8323. 10.1039/C5TA01101A.

[2] Liu, G.-Q.; Wang, F.; Luo, S.-J.; Xu, D.-Y.; Guo, R.-B. Enhanced methane hydrate formation with SDS-coated Fe3O4 nanoparticles as promoters. *J. Mol. Liq.* **2017**, *230*, 315-321. 10.1016/J.MOLLIQ.2016.12.050.

[3] Song, Y.-M.; Wang, F.; Guo, G.; Luo, S.-J.; Guo, R.-B. Amphiphilic-Polymer-Coated Carbon Nanotubes as Promoters for Methane Hydrate Formation. *ACS Sustain. Chem. Eng.* **2017**, *5*, 9271-9278. 10.1021/acssuschemeng.7b02239.
